# Supplementary material for: Discovery and validation of a glioblastoma co-expressed gene module
Source: PubMed Central journal article supplement (PMC5834250; doi:10.18632/oncotarget.24228), 2018-01-13
Supplement: oncotarget-09-10995-s001.pdf [file oncotarget-09-10995-s001.pdf]

## Discovery and validation of a glioblastoma co-expressed gene module

### SUPPLEMENTARY MATERIALS

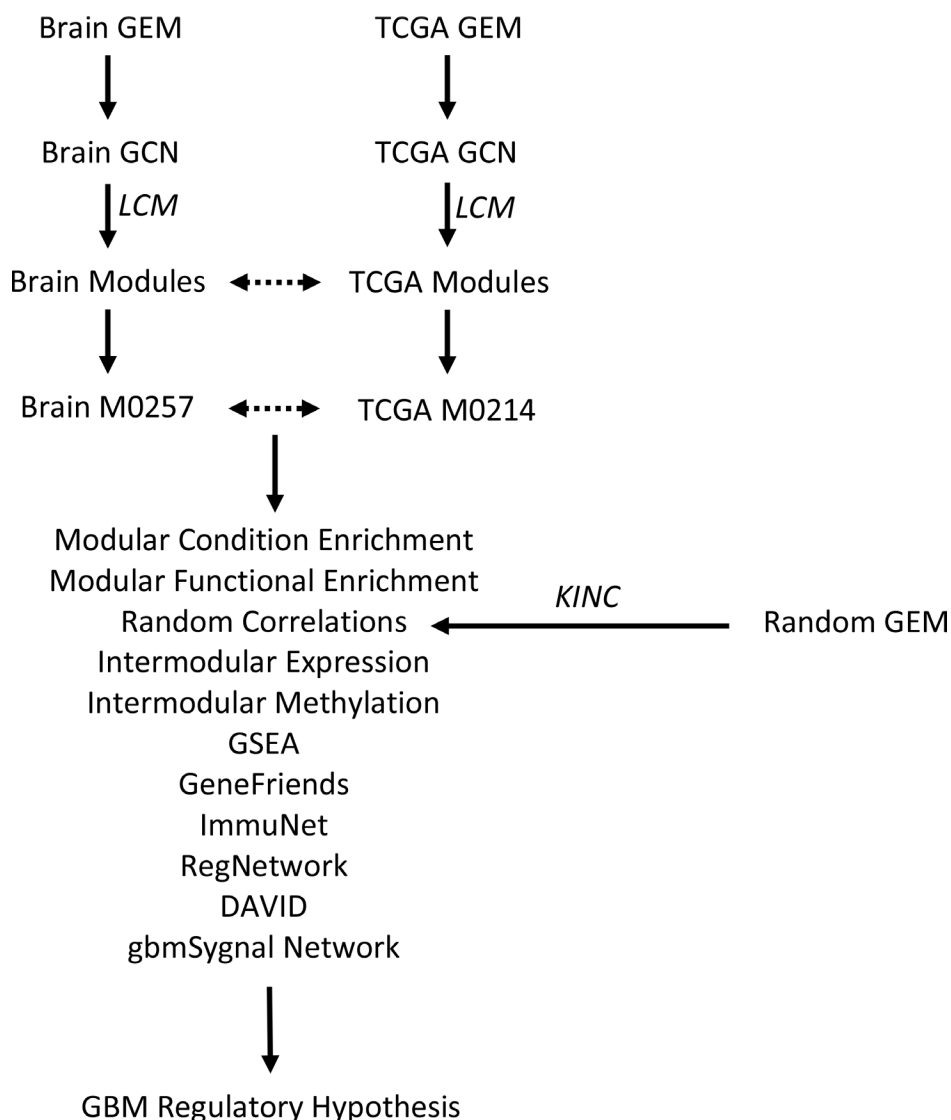

**Supplementary Figure 1: Condition-specific gene module discovery and validation workflow.** The Brain and TCGA GEMs were each used to create a GCNs and modules with KINC and link communities software, respectively. The genes in these LCMs were compared between GCNs. Two modules, TCGA M0214 and Brain M0257, had 22 overlapping genes. Further analyses compared these modules and their 22 overlapping genes. Dashed double-headed arrows represent these comparisons. Gene expression correlations in random human RNAseq datasets were also compared to these modules. The resulting data was used to hypothesize a common role for TCGA modules M0214 and M0257 in glioblastoma tumors.

**Supplementary Table 1: TCGA network edge list.** See Supplementary\_Table\_1

**Supplementary Table 2: Brain network edge list.** See Supplementary\_Table\_2

**Supplementary Table 3: TCGA network module enrichments.** See Supplementary\_Table\_3

**Supplementary Table 4: Brain network modules enrichments.** See Supplementary\_Table\_4

**Supplementary Table 5: TCGA M0214 and brain M0257 genes.** See Supplementary\_Table\_5

**Supplementary Table 6: Gene expression of the 22 shared genes in the TCGA GEM.** See Supplementary\_Table\_6

**Supplementary Table 7: Gene expression of the 22 shared genes in the Brain GEM.** See Supplementary\_Table\_7

**Supplementary Table 8: gbmSignal biclusters involving genes from TCGA M0214 or Brain M0257.** See Supplementary\_Table\_8

**Supplementary Table 9: Transcription factor enrichment.** See Supplementary\_Table\_9

**Supplementary Table 10: ELF1 transcription factor enrichment.** See Supplementary\_Table\_10

**Supplementary Table 11: GeneFriends analysis.** See Supplementary\_Table\_11

**Supplementary Table 12: RegNetwork database analysis.** See Supplementary\_Table\_12

**Supplementary Table 13: GBM versus normal expression analysis.** See Supplementary\_Table\_13

**Supplementary Table 14: ImmuNet database analysis.** See Supplementary\_Table\_14
